# Supplementary material
Source: MDPI journal article supplement (https://www.mdpi.com/2072-4292/13/9/1652)
Supplement: s1 [file s1]

# Statistical characteristics of mesoscale convective systems initiated over the Tibetan Plateau in summer by Fengyun satellite and precipitation estimates

Xidi Zhang, Wenqiang Shen, Xiaoyong Zhuge, Shunan Yang, Yun Chen, Yuan Wang, Tao Chen and Shushi Zhang

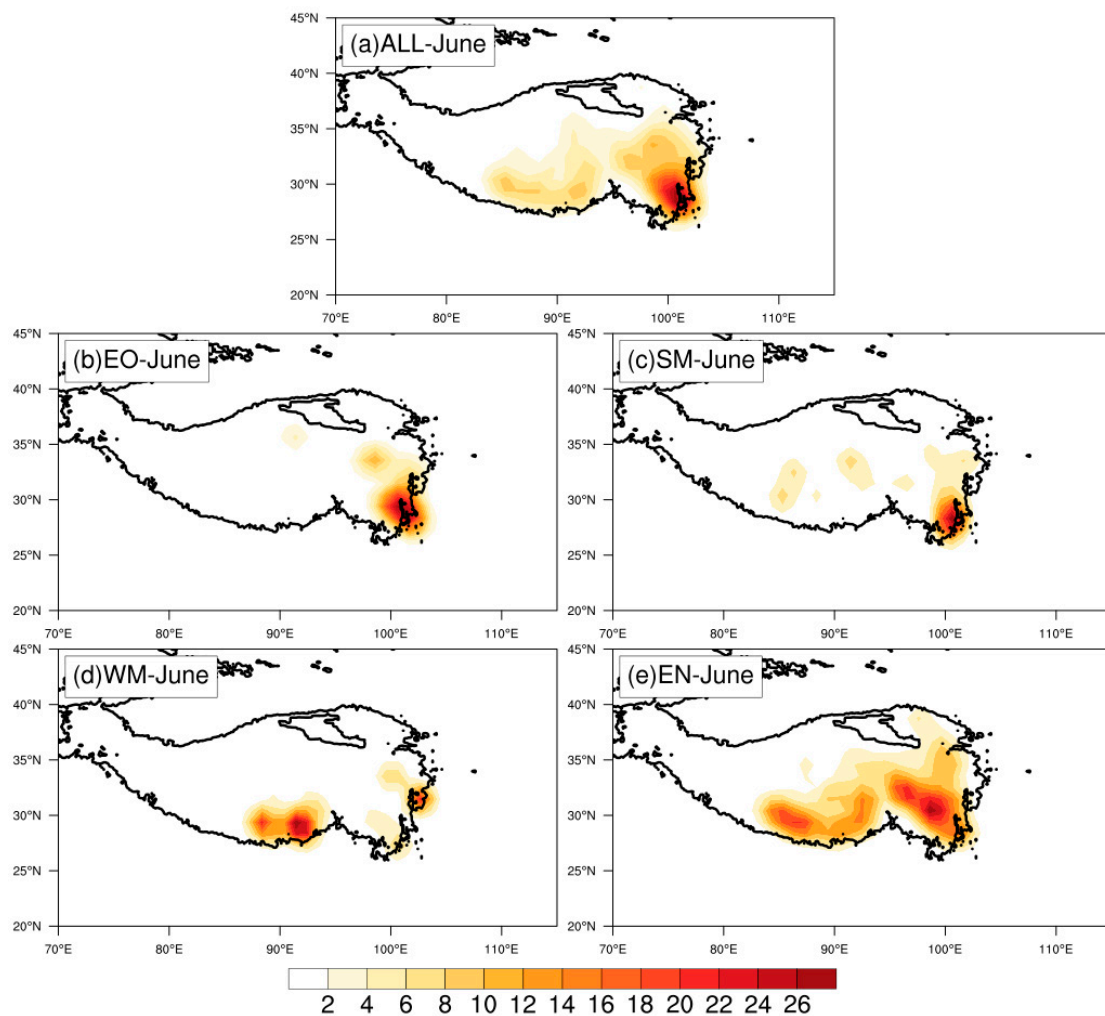

**Figure S1.** Spatial distribution of MCSs initiation over the TP on 1°×1° grids in June. (a) All MCSs; (b) EOs; (c) SMs; (d) WMs; and (e) ENs.

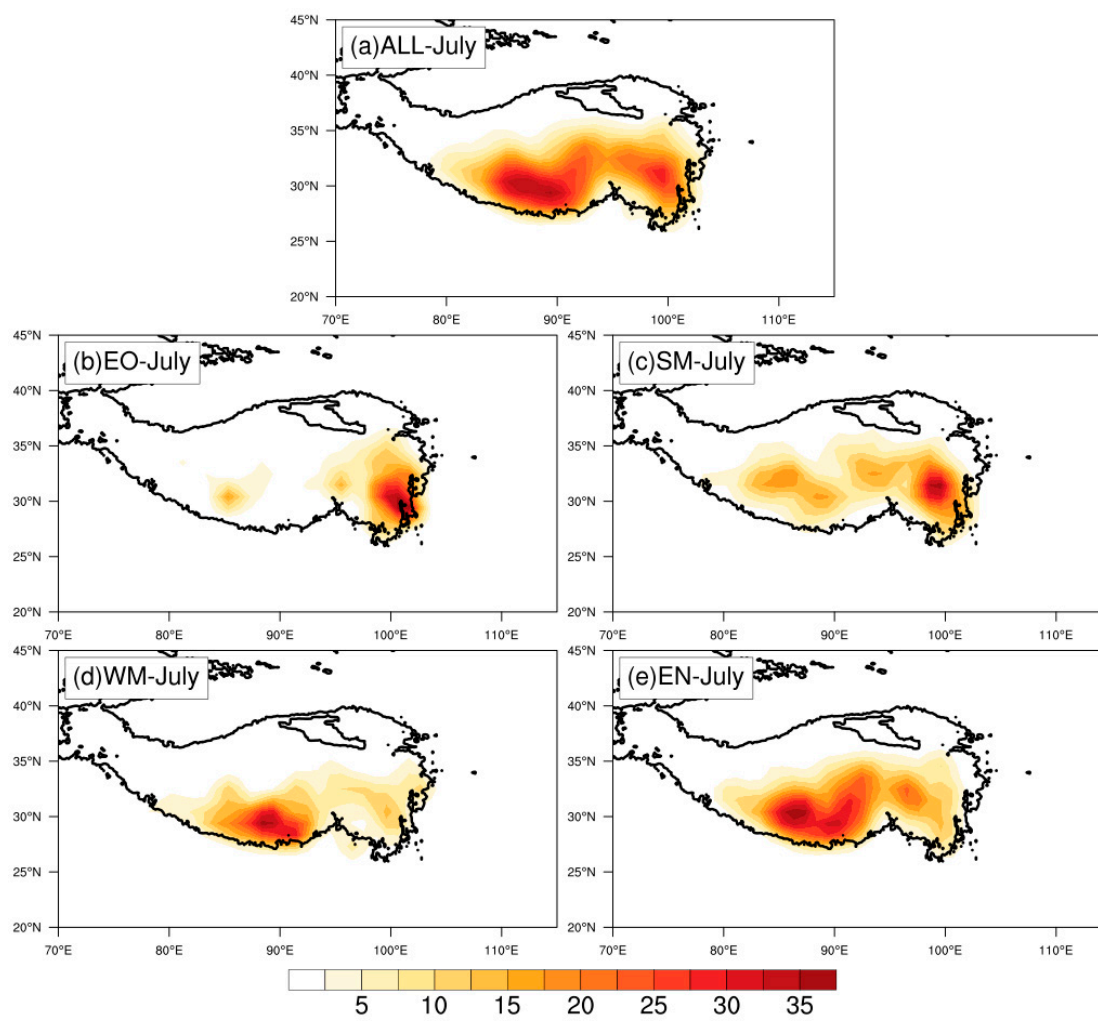

**Figure S2.** The same for Figure 1, but for July.

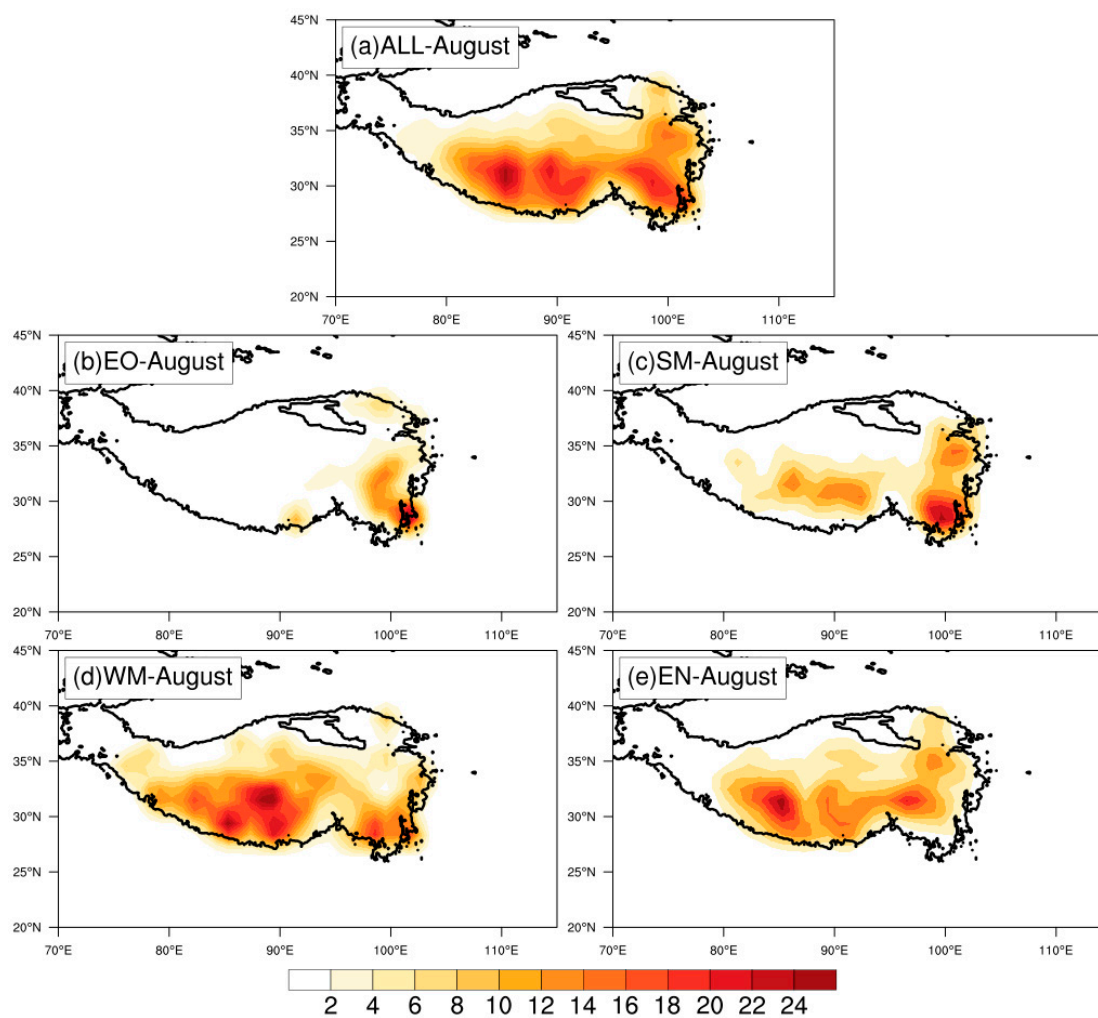

**Figure S3.** The same for Figure 1, but for August.
